# Supplementary material
Source: PubMed Central journal article supplement (PMC2868547)
Supplement: embor201044-s1.pdf [file embor201044-s1.pdf]

## SUPPLEMENTARY DATA

### microRNA/Argonaute2 regulates nonsense-mediated mRNA decay

Junho Choe, Hana Cho, and Yoon Ki Kim \*

\*Correspondence: [yk-kim@korea.ac.kr](mailto:yk-kim@korea.ac.kr) (Y.K.K)

Tel: 82-2-3290-3410

## SUPPLEMENTARY MATERIALS AND METHODS

### Plasmid construction

To construct eIF4E-BP1, an EcoRI/XhoI fragment of pCMV-Myc (Clontech) was ligated to a PCR-amplified eIF4E-BP1 cDNA fragment. The full-length human eIF4E-BP1 cDNA was amplified using pOTB7-eIF4E-BP1 (21C Human Gene Bank, Genome Research Center, KRIBB, Korea) and two oligonucleotides: 5'-  
GGAATTCGGGATCCGATGTCCGGGGGCAGCAGCTGCAGCCAG-3' (sense) and 5'-  
CCCTCGAGAAAGCTTTTAAATGTCCATCTCAAAGTGTGACTC-3' (antisense), where the underlined nucleotides specify the EcoRI and XhoI sites, respectively. The resulting PCR product was digested with EcoRI and XhoI. PCR amplification was carried out using the Advantage-HF2 PCR Kit (Clontech).

pCI-λN-HA was generated using pCI-λN-HA-Ago2 (Kiriakidou *et al.*, 2007; Pillai *et al.*, 2004) that was digested with EcoRI and NotI and self-ligated.

Tethering NMD reporter plasmids phRL-GI-5BoxB Norm and Ter were constructed by inserting the β-globin (GI) gene (either Norm or 39Ter), which was PCR-amplified from

pmCMV-Gl Norm or 39Ter (Cho *et al.*, 2009; Kim *et al.*, 2005), into the site immediately upstream of the stop codon of the *Renilla* luciferase (RLuc) cDNA in plasmid RL-5BoxB (Kiriakidou *et al.*, 2007).

To generate miRNA binding site-containing NMD reporter plasmids pRL-Gl-CXCR4 Norm and Ter, pRL-Gl Norm or Ter was first constructed, which contains a chimeric RLuc-Gl (either Norm or 39Ter) gene. The Gl Norm or 39Ter DNA fragment was amplified by PCR using pmCMV-Gl Norm or 39Ter (Cho *et al.*, 2009; Kim *et al.*, 2005). Then, a CXCR4-6xBulge fragment from pcDNA3.1-FLuc-CXCR4-6xBulge (a gift from Sung Key Jang) was inserted into the 3'UTR.

pRL-Gl-CAT-1A Norm and Ter and pRL-Gl-CAT-1C Norm and Ter were constructed by inserting a CAT-1A or CAT-1C fragment obtained from pRL-CAT-1A (Bhattacharyya *et al.*, 2006) or pRL-CAT-1C (Bhattacharyya *et al.*, 2006) into the XbaI and NotI sites of the 3'UTR of pRL-Gl Norm or Ter.

To construct plasmid pCI-F, which encodes firefly luciferase (FLuc) cDNA, the XbaI/Klenow-filled NheI fragment from pCI-Neo (Promega) was ligated to an XbaI/Klenow-filled NcoI fragment containing the FLuc cDNA.

To construct pcDNA3-FLAG-CBP20, a BamHI/HindIII fragment of pcDNA3-FLAG (Kim *et al.*, 2009) was ligated to a PCR-amplified CBP20 cDNA fragment. The full-length human CBP20 cDNA was amplified using pCNS-D2-CBP20 (21C Human Gene Bank, Genome Research Center, KRIBB, Korea) and two oligonucleotides: 5'-CGGGATCCGATGTCGGGTGGCCTCCTGAAGGCGCTG-3' (sense) and 5'-CCCAAGCTTTCACTGGTTCTGTGCCAGTTTTCCATAG-3' (antisense), where the underlined nucleotides specify the BamHI and HindIII sites, respectively. The resulting PCR product was digested with BamHI and HindIII.

The construction details for pcDNA3-FLAG-eIF4E were previously reported (Kim *et*

*al.*, 2009).

### ***In vivo* UV cross-linking followed by immunoprecipitation**

Cos-7 cells ( $2 \times 10^7$ ) were exposed to ultraviolet (UV;  $250 \text{ mJ/cm}^2$ ) for 5 min in 4 ml of ice-cold DMEM supplemented with 10% FBS using a Bio-Link Crosslinker (Vilber Lourmat). Total-cell extracts were obtained from cells either exposed or not exposed to UV, and incubated at  $65^\circ\text{C}$  for 3 min with addition of 0.1% SDS to dissociate non-covalent interactions. The IPs were performed as previously described (Cho *et al.*, 2009; Kim *et al.*, 2005), except that NET2 buffer containing 800 mM of NaCl was used.

### **SUPPLEMENTARY FIGURE LEGENDS**

**Supplementary Fig S1.** Endogenous Ago2 and eIF4AIII associate with FLAG-CBP20 *in vivo*. Cos-7 cells were transiently transfected with plasmid expressing either FLAG-CBP20 or FLAG-eIF4E. Two days after transfection, cells were either exposed to UV for 5 min to induce cross-linking between RNA and proteins *in vivo* (+ UV exposure) or not exposed to UV (- UV exposure). Each extract was incubated at  $65^\circ\text{C}$  for 3 min to dissociate noncovalent interactions. IPs were then performed using anti-FLAG antibody. Samples before or after IP were analyzed by Western blotting using indicated antibodies.

**Supplementary Fig S2.** Downregulation of endogenous eIF4AIII, Upf1, or Y14 abrogates NMD of GI-5BoxB mRNAs and GI-CXCR4 mRNAs. HeLa cells were transiently transfected with 100 nM eIF4AIII siRNA [5'-r(CGAGCAAUCAAGCAGAUCA)d(TT)-3'], Upf1 siRNA [5'-r(GAUGCAGUUCCGCUCCAUU)d(TT)-3'], Y14 siRNA [5'-r(UCCAGCCUUCAACAGAGCG)d(TT)-3'], or nonspecific Control siRNA [5'-r(ACAAUCCUGAUCAGAAACC)d(TT)-3']. Two days later, cells were retransfected with

0.1  $\mu$ g of either tethering NMD construct or miRNA-targeted NMD construct, and 0.1  $\mu$ g of reference plasmid pCI-F. After an additional day, protein and RNA were purified. **(A)** Western blotting of endogenous eIF4AIII. The result showed that the level of endogenous eIF4AIII was downregulated to 10% of normal, where normal is defined as the level in the presence of nonspecific Control siRNA. The level of endogenous GAPDH served to control for variations in protein loading. **(B)** Semi-quantitative RT-PCR of Gl-5BoxB Norm and Ter mRNAs. The levels of Gl-5BoxB mRNAs were normalized to the levels of FLuc mRNAs. Normalized levels of Gl-5BoxB Norm mRNA in the presence of each siRNA were set to 100%. **(C)** Western blotting of endogenous Upf1 and Y14. The levels of endogenous Upf1 and Y14 were downregulated to 0.1% and 2% of normal. The level of endogenous  $\beta$ -actin served to control for variations in protein loading. **(D)** Semi-quantitative RT-PCR of Gl-5BoxB Norm and Ter mRNAs. The levels of Gl-5BoxB mRNAs were normalized to the levels of FLuc mRNAs. Normalized levels of Gl-5BoxB Norm mRNA in the presence of each siRNA were set to 100%. **(E, F)** As in Supplementary Fig S2B and S2D, respectively, except that miRNA-targeted NMD construct, pRL-Gl-CXCR4 Norm or Ter was transfected.

**Supplementary Fig S3.** Gl-CAT-1C mRNA, but not Gl-CAT-1A mRNA, is efficiently targeted for NMD. Huh-7 cells were transiently cotransfected with 0.05  $\mu$ g of pRL-Gl-CAT-1A or pRL-Gl-CAT-1C harboring Norm or Ter, and 0.05  $\mu$ g of pCI-F. **(A)** Semi-quantitative RT-PCR of Gl-CAT-1A mRNAs and Gl-CAT-1C mRNAs. **(B)** Translational efficiencies of Gl-CAT-1A Norm mRNA and Gl-CAT-1C Norm mRNA.

**Supplementary Table S1.** A subset of cellular NMD substrates escapes NMD in a miRNA/Ago2-dependent manner. **(A)** Transcripts commonly downregulated upon downregulation of Ago2 in two independently performed microarray analyses. The fold-

changes of transcripts downregulated upon downregulation of either Ago2 or Upf1 are depicted in the Ago2 or Upf1 column, respectively. The ratios of the levels of transcript upon downregulation of both Ago2 and Upf1 to the levels of transcript upon downregulation of Ago2 are depicted in the Ago2&Upf1/Ago2 column. Cellular transcripts downregulated more than 1.8-fold upon downregulation of Ago2 and restored more than 1.8-fold upon downregulation of both Ago2 and Upf1 are highlighted in blue. The ranges of fold-changes are depicted as standard deviation ( $\pm$ ) in each column. The presence of uORF at the 5'UTR is depicted in the uORF column. **(B)** Transcripts commonly upregulated upon downregulation of Ago2 in two independently performed microarray analyses.

#### **SUPPLEMENTARY REFERENCES**

- Bhattacharyya SN, Habermacher R, Martine U, Closs EI, Filipowicz W (2006) Relief of microRNA-mediated translational repression in human cells subjected to stress. *Cell* **125**: 1111-1124
- Cho H, Kim KM, Kim YK (2009) Human proline-rich nuclear receptor coregulatory protein 2 mediates an interaction between mRNA surveillance machinery and decapping complex. *Mol Cell* **33**: 75-86
- Kim KM, Cho H, Choi K, Kim J, Kim BW, Ko YG, Jang SK, Kim YK (2009) A new MIF4G domain-containing protein, CTIF, directs nuclear cap-binding protein CBP80/20-dependent translation. *Genes Dev* **23**: 2033-2045
- Kim YK, Furic L, Desgroseillers L, Maquat LE (2005) Mammalian Staufen1 recruits Upf1 to specific mRNA 3'UTRs so as to elicit mRNA decay. *Cell* **120**: 195-208
- Kiriakidou M, Tan GS, Lamprinaki S, De Planell-Saguer M, Nelson PT, Mourelatos Z (2007) An mRNA m7G cap binding-like motif within human Ago2 represses translation. *Cell* **129**: 1141-1151

Pillai RS, Artus CG, Filipowicz W (2004) Tethering of human Ago proteins to mRNA mimics the miRNA-mediated repression of protein synthesis. *RNA* **10**: 1518-1525

Figure S1

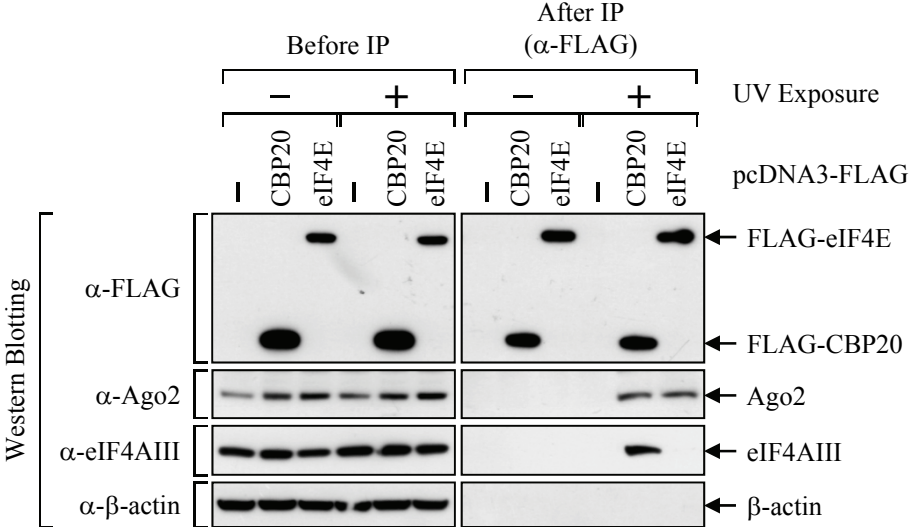

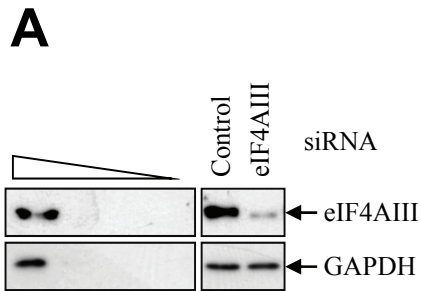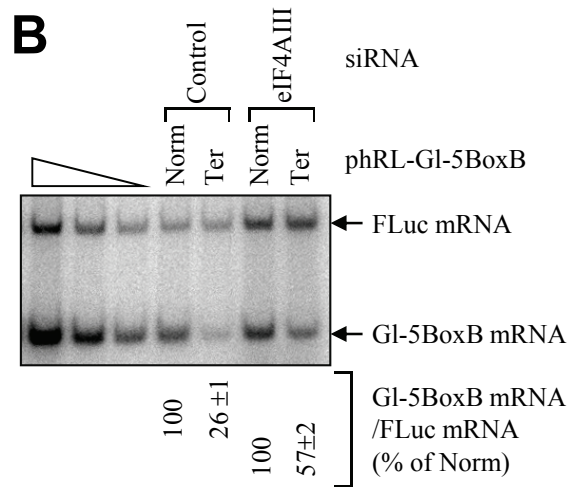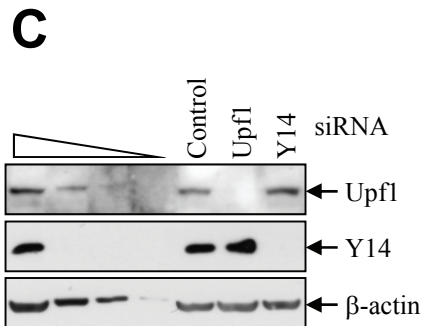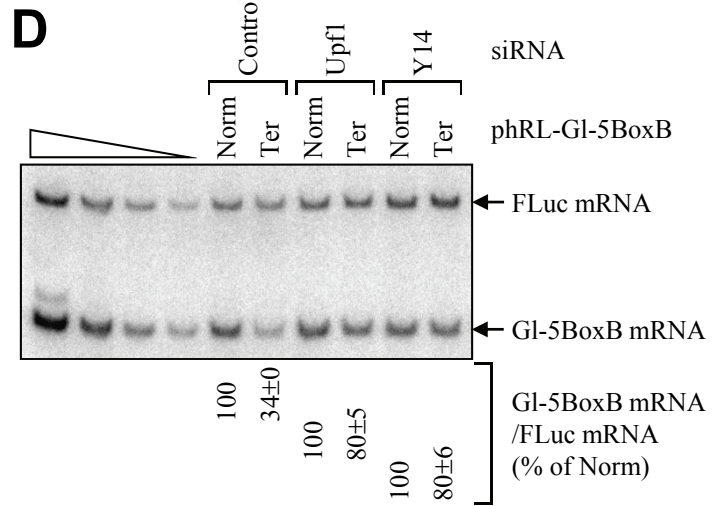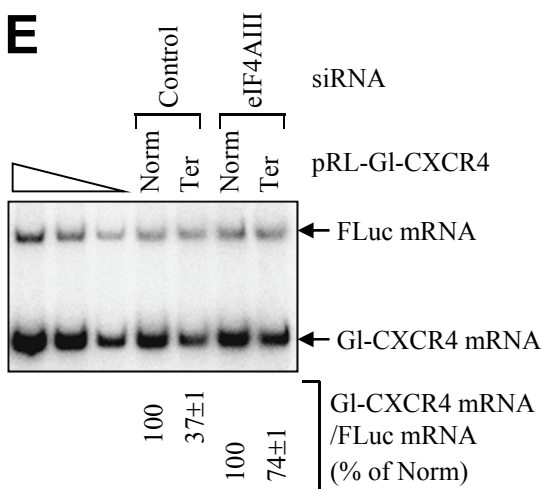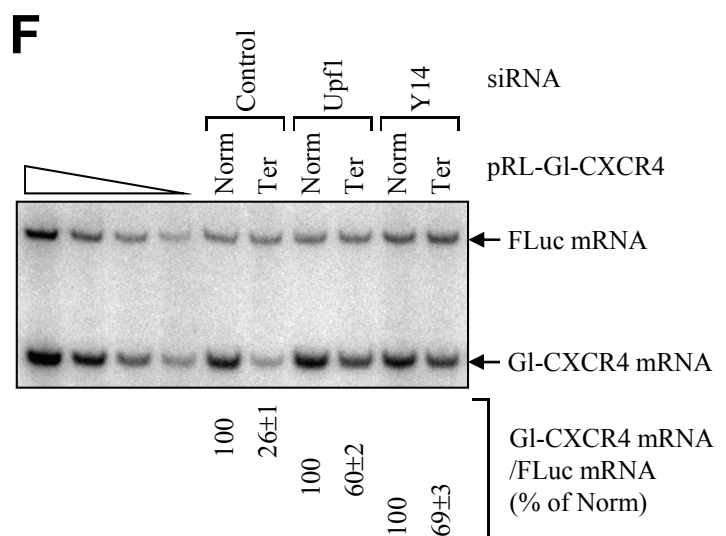



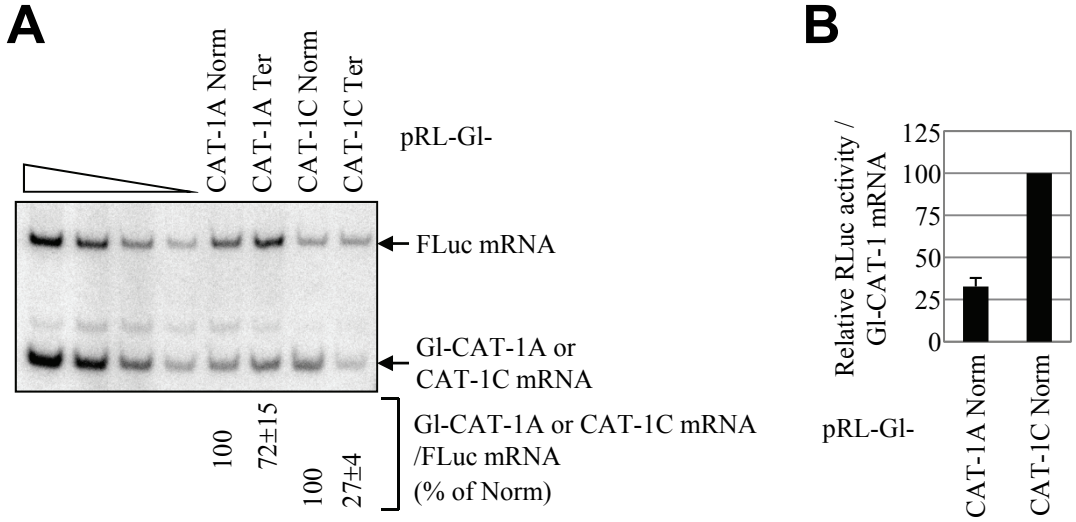

Supplementary Table S1A. Transcripts downregulated in Ago2-depleted HeLa cells

| Gene Symbol | Definition                                                                                                                                              | Accession No.  | Fold changes |           |                  | uORF |
|-------------|---------------------------------------------------------------------------------------------------------------------------------------------------------|----------------|--------------|-----------|------------------|------|
|             |                                                                                                                                                         |                | Ago2         | Ago2&Upfl | Ago2&Upfl / Ago2 |      |
| PRNP        | prion protein (p27-30) (Creutzfeldt-Jakob disease, Gerstmann-Strausler-Scheinker syndrome, fatal familial insomnia) (PRNP), transcript variant 2, mRNA. | NM_183079.2    | 0.29±0.00    | 0.54±0.12 | 1.88±0.42        | +    |
| LAMC1       | laminin, gamma 1 (formerly LAMB2) (LAMC1), mRNA.                                                                                                        | NM_002293.2    | 0.33±0.00    | 0.47±0.03 | 1.42±0.08        |      |
| PCK2        | phosphoenolpyruvate carboxykinase 2 (mitochondrial) (PCK2), nuclear gene encoding mitochondrial protein, transcript variant 1, mRNA.                    | NM_004563.2    | 0.37±0.02    | 0.56±0.06 | 1.51±0.06        |      |
| ASNS        | asparagine synthetase (ASNS), transcript variant 1, mRNA.                                                                                               | NM_133436.1    | 0.38±0.00    | 0.80±0.30 | 2.1±0.77         | +    |
| SLC38A1     | solute carrier family 38, member 1 (SLC38A1), mRNA.                                                                                                     | NM_030674.2    | 0.38±0.03    | 0.53±0.06 | 1.54±0.49        | +    |
| STC2        | stanniocalcin 2 (STC2), mRNA.                                                                                                                           | NM_003714.2    | 0.39±0.02    | 1.06±0.05 | 2.76±0.31        | +    |
| MAP1LC3B    | microtubule-associated protein 1 light chain 3 beta (MAP1LC3B), mRNA.                                                                                   | NM_022818.3    | 0.41±0.02    | 0.72±0.02 | 1.79±0.16        | +    |
| RNGTT       | RNA guanylyltransferase and 5'-phosphatase (RNGTT), mRNA.                                                                                               | NM_003800.1    | 0.41±0.01    | 0.46±0.02 | 1.12±0.07        | +    |
| INHBE       | inhibin, beta E (INHBE), mRNA.                                                                                                                          | NM_031479.3    | 0.41±0.04    | 0.68±0.03 | 1.68±0.23        |      |
| ECM2        | extracellular matrix protein 2, female organ and adipocyte specific (ECM2), mRNA.                                                                       | NM_001393.2    | 0.42±0.02    | 0.58±0.07 | 1.39±0.26        | +    |
| MLXIPL      | MLX interacting protein-like (MLXIPL), transcript variant 3, mRNA.                                                                                      | NM_032953.2    | 0.42±0.01    | 0.55±0.09 | 1.30±0.16        |      |
| TRIB3       | tribbles homolog 3 (Drosophila) (TRIB3), mRNA.                                                                                                          | NM_021158.3    | 0.43±0.02    | 0.80±0.14 | 1.86±0.25        | +    |
| PSPH        | phosphoserine phosphatase (PSPH), mRNA.                                                                                                                 | NM_004577.3    | 0.43±0.01    | 0.66±0.04 | 1.53±0.05        | +    |
| MAPK6       | mitogen-activated protein kinase 6 (MAPK6), mRNA.                                                                                                       | NM_002748.2    | 0.43±0.05    | 0.68±0.15 | 1.57±0.17        | +    |
| HSCARG      | NimrA-like family domain containing 1 (NMRAL1), mRNA.                                                                                                   | NM_020677.2    | 0.43±0.01    | 0.49±0.02 | 1.14±0.07        | +    |
| IL8         | interleukin 8 (IL8), mRNA.                                                                                                                              | NM_000584.2    | 0.44±0.02    | 0.47±0.06 | 1.08±0.08        |      |
| CCL20       | chemokine (C-C motif) ligand 20 (CCL20), mRNA.                                                                                                          | NM_004591.1    | 0.44±0.02    | 0.46±0.04 | 1.05±0.04        |      |
| NUPR1       | nuclear protein 1 (NUPR1), transcript variant 1, mRNA.                                                                                                  | NM_001042483.1 | 0.44±0.06    | 1.14±0.29 | 2.66±1.04        | +    |
| PCK2        | phosphoenolpyruvate carboxykinase 2 (mitochondrial) (PCK2), nuclear gene encoding mitochondrial protein, transcript variant 2, mRNA.                    | NM_001018073.1 | 0.44±0.08    | 0.65±0.06 | 1.51±0.17        |      |
| HIST1H2BD   | histone cluster 1, H2bd (HIST1H2BD), transcript variant 2, mRNA.                                                                                        | NM_138720.1    | 0.44±0.02    | 0.86±0.24 | 1.98±0.43        |      |
| MGC33212    | hypothetical protein MGC33212 (MGC33212), mRNA.                                                                                                         | NM_152773.2    | 0.45±0.03    | 0.61±0.20 | 1.33±0.36        |      |
| LOC203547   | hypothetical protein LOC203547 (LOC203547), mRNA.                                                                                                       | NM_001017980.1 | 0.46±0.02    | 0.66±0.00 | 1.45±0.08        |      |
| CYP4V2      | cytochrome P450, family 4, subfamily V, polypeptide 2 (CYP4V2), mRNA.                                                                                   | NM_207352.2    | 0.46±0.03    | 0.57±0.00 | 1.26±0.06        |      |
| RAB21       | RAB21, member RAS oncogene family (RAB21), mRNA.                                                                                                        | NM_014999.1    | 0.46±0.00    | 0.55±0.06 | 1.20±0.15        |      |
| GPT2        | glutamic pyruvate transaminase (alanine aminotransferase) 2 (GPT2), mRNA.                                                                               | NM_133443.1    | 0.46±0.01    | 1.28±0.06 | 2.75±0.18        | +    |
| MT1F        | metallothionein 1F (MT1F), mRNA.                                                                                                                        | NM_005949.1    | 0.47±0.04    | 0.35±0.16 | 0.74±0.28        |      |
| C5orf15     | chromosome 5 open reading frame 15 (C5orf15), mRNA.                                                                                                     | NM_020199.1    | 0.47±0.01    | 0.72±0.09 | 1.55±0.23        | +    |
| GIPCI       | GIPC PDZ domain containing family, member 1 (GIPC1), transcript variant 3, mRNA.                                                                        | NM_202468.1    | 0.47±0.03    | 0.73±0.10 | 1.54±0.12        |      |
| P8          | p8 protein (candidate of metastasis 1) (P8), mRNA.                                                                                                      | NM_012385.1    | 0.47±0.04    | 1.11±0.33 | 2.38±0.90        | +    |
| PSAT1       | phosphoserine aminotransferase 1 (PSAT1), transcript variant 2, mRNA.                                                                                   | NM_021154.3    | 0.48±0.04    | 0.72±0.19 | 1.50±0.29        |      |
| TNFRSF11B   | tumor necrosis factor receptor superfamily, member 11b (osteoprotegerin) (TNFRSF11B), mRNA.                                                             | NM_002546.2    | 0.48±0.01    | 0.76±0.20 | 1.59±0.37        | +    |
| DBT         | dihydroipoamide branched chain transacylase E2 (DBT), mRNA.                                                                                             | NM_001918.1    | 0.48±0.01    | 0.73±0.09 | 1.52±0.21        |      |
| STK39       | serine threonine kinase 39 (STE20/SPS1 homolog, yeast) (STK39), mRNA.                                                                                   | NM_013233.1    | 0.49±0.03    | 0.58±0.06 | 1.18±0.19        |      |
| IRAK2       | interleukin-1 receptor-associated kinase 2 (IRAK2), mRNA.                                                                                               | NM_001570.3    | 0.49±0.01    | 0.82±0.04 | 1.67±0.04        |      |
| RWDD4A      | RWD domain containing 4A (RWDD4A), mRNA.                                                                                                                | NM_152682.1    | 0.49±0.01    | 0.65±0.07 | 1.32±0.17        |      |
| GOLPH2      | golgi phosphoprotein 2 (GOLPH2), transcript variant 1, mRNA.                                                                                            | NM_016548.2    | 0.50±0.03    | 0.63±0.00 | 1.26±0.06        |      |

|          |                                                                                                     |             |           |           |           |   |
|----------|-----------------------------------------------------------------------------------------------------|-------------|-----------|-----------|-----------|---|
| KCNGB1   | potassium voltage-gated channel, subfamily G, member 1 (KCNGB1), transcript variant 1, mRNA.        | NM_002237.2 | 0.51±0.05 | 0.54±0.02 | 1.05±0.07 |   |
| ARL1     | ADP-ribosylation factor-like 1 (ARL1), mRNA.                                                        | NM_001177.3 | 0.51±0.02 | 0.66±0.08 | 1.31±0.03 |   |
| EIF2C2   | eukaryotic translation initiation factor 2C, 2 (EIF2C2), mRNA.                                      | NM_012154.2 | 0.51±0.09 | 0.50±0.04 | 0.98±0.04 |   |
| JUB      | jub, ajuba homolog (Xenopus laevis) (JUB), transcript variant 2, mRNA.                              | NM_198086.1 | 0.51±0.02 | 0.90±0.24 | 1.77±0.54 | + |
| UBE2Q1   | ubiquitin-conjugating enzyme E2Q (putative) 1 (UBE2Q1), mRNA.                                       | NM_017582.5 | 0.51±0.08 | 0.62±0.03 | 1.23±0.12 |   |
| C16orf63 | chromosome 16 open reading frame 63 (C16orf63), mRNA.                                               | NM_144600.1 | 0.51±0.02 | 0.66±0.09 | 1.29±0.02 |   |
| MIRPS10  | mitochondrial ribosomal protein S10 (MIRPS10), nuclear gene encoding mitochondrial protein, mRNA.   | NM_018141.2 | 0.52±0.01 | 0.57±0.06 | 1.09±0.10 |   |
| CCDC23   | coiled-coil domain containing 23 (CCDC23), mRNA.                                                    | NM_199342.1 | 0.53±0.00 | 0.60±0.12 | 1.14±0.15 |   |
| C20orf45 | chromosome 20 open reading frame 45 (C20orf45), mRNA.                                               | NM_016045.1 | 0.53±0.00 | 0.61±0.09 | 1.15±0.15 |   |
| RPS23    | ribosomal protein S23 (RPS23), mRNA.                                                                | NM_001025.4 | 0.53±0.06 | 0.63±0.05 | 1.20±0.23 |   |
| ERRF1    | ERBB receptor feedback inhibitor 1 (ERRF1), mRNA.                                                   | NM_018948.2 | 0.53±0.05 | 0.82±0.08 | 1.55±0.00 | + |
| EMR2     | egf-like module containing, mucin-like, hormone receptor-like 2 (EMR2), transcript variant 2, mRNA. | NM_152916.1 | 0.53±0.00 | 0.60±0.06 | 1.14±0.11 |   |
| PAK2     | p21 (CDKN1A)-activated kinase 2 (PAK2), mRNA.                                                       | NM_002577.3 | 0.53±0.01 | 0.68±0.08 | 1.28±0.17 |   |
| CXCL2    | chemokine (C-X-C motif) ligand 2 (CXCL2), mRNA.                                                     | NM_002089.1 | 0.53±0.04 | 0.84±0.09 | 1.57±0.06 | + |
| LARP6    | La ribonucleoprotein domain family, member 6 (LARP6), transcript variant 1, mRNA.                   | NM_018357.2 | 0.54±0.02 | 0.61±0.16 | 1.12±0.26 |   |
| WARS     | tryptophanyl-tRNA synthetase (WARS), transcript variant 4, mRNA.                                    | NM_213646.1 | 0.54±0.01 | 0.65±0.00 | 1.20±0.01 | + |
| DDIT3    | DNA-damage-inducible transcript 3 (DDIT3), mRNA.                                                    | NM_004083.4 | 0.54±0.07 | 1.03±0.17 | 1.90±0.09 | + |
| RBM28    | RNA binding motif protein 28 (RBM28), mRNA.                                                         | NM_018077.1 | 0.55±0.04 | 0.66±0.01 | 1.20±0.06 |   |

Supplementary Table S1B: Transcripts upregulated in Ago2-depleted HeLa cells

| Gene Symbol | Definition                                                    | Accession No. | Fold changes |           |                       |   |
|-------------|---------------------------------------------------------------|---------------|--------------|-----------|-----------------------|---|
|             |                                                               |               | Ago2         | Ago2&Upfl | Ago2&Upfl / Ago2 uORF |   |
| TYRP1       | tyrosinase-related protein 1 (TYRP1), mRNA.                   | NM_000550.1   | 2.28±0.27    | 2.30±0.34 | 1.01±0.03             |   |
| TMEM2       | transmembrane protein 2 (TMEM2), mRNA.                        | NM_013390.1   | 2.25±0.11    | 2.29±0.01 | 1.02±0.06             | + |
| C1orf41     | chromosome 1 open reading frame 41 (C1orf41), mRNA.           | NM_016126.1   | 1.99±0.01    | 1.95±0.83 | 0.98±0.41             |   |
| CCNE2       | cyclin E2 (CCNE2), transcript variant 2, mRNA.                | NM_057735.1   | 1.98±0.26    | 1.81±0.02 | 0.92±0.13             |   |
| BTG2        | BTG family, member 2 (BTG2), mRNA.                            | NM_006763.2   | 1.96±0.17    | 1.56±0.20 | 0.79±0.03             |   |
| EMPI        | epithelial membrane protein 1 (EMPI), mRNA.                   | NM_001423.1   | 1.89±0.10    | 1.74±0.07 | 0.92±0.09             |   |
| GABARAPL1   | GABA(A) receptor-associated protein like 1 (GABARAPL1), mRNA. | NM_031412.2   | 1.89±0.11    | 3.80±0.09 | 2.02±0.17             |   |
| KLF2        | Kruppel-like factor 2 (lung) (KLF2), mRNA.                    | NM_016270.2   | 1.85±0.09    | 2.93±0.27 | 1.58±0.07             |   |
| ACTC        | actin, alpha, cardiac muscle (ACTC), mRNA.                    | NM_005159.3   | 1.80±0.19    | 2.04±0.09 | 1.13±0.07             | + |
